# Supplementary material for: Differential transcriptional networks associated with key phases of ingrowth wall construction in trans-differentiating epidermal transfer cells of Vicia faba cotyledons
Source: PubMed Central journal article supplement (PMC4437447; doi:10.1186/s12870-015-0486-5), 2015-04-16
Supplement: 12870_2015_486_MOESM2_ESM.pdf [file 12870_2015_486_MOESM2_ESM.pdf]

## Additional file 2:

### Quality assessment of total RNA extracted from adaxial epidermal and storage parenchyma cells of *V. faba* cotyledons.

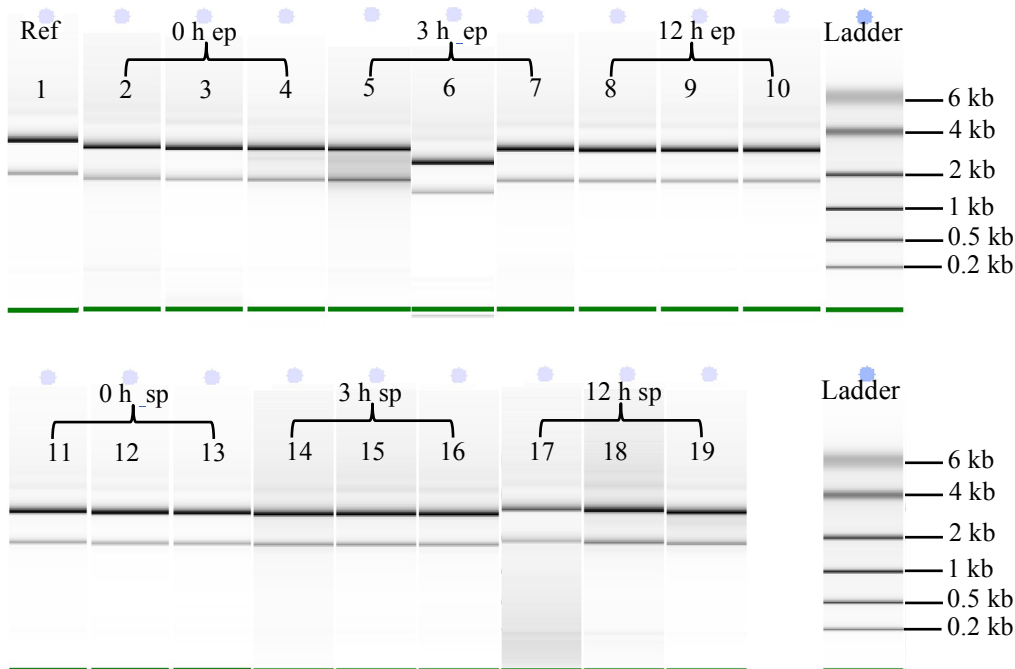

**Figure S2. Quality assessment of total RNA extracted from adaxial epidermal (ep, lane 1 – 10) and storage parenchyma (sp lane 11 – 19) cells of *V. faba* cotyledons.** Total RNA for construction of the *de novo* assembled reference transcriptome library (lane 1) was pooled from total RNA extracted from freshly-harvested (0 h) cotyledons and cotyledons cultured for specified times. To determine the transcriptome of *trans*-differentiating adaxial epidermal cells undergoing uniform wall or wall ingrowth deposition, total RNA was extracted from adaxial epidermal and storage parenchyma tissues of cotyledons freshly harvested (lane 2 – 4, 11 – 13) or cultured for 3 h (lane 5 – 7, 14 – 16) and 12 h (lane 8 – 10, 17 – 19).
