# Supplementary material for: Differential transcriptional networks associated with key phases of ingrowth wall construction in trans-differentiating epidermal transfer cells of Vicia faba cotyledons
Source: PubMed Central journal article supplement (PMC4437447; doi:10.1186/s12870-015-0486-5), 2015-04-16
Supplement: 12870_2015_486_MOESM3_ESM.pdf [file 12870_2015_486_MOESM3_ESM.pdf]

**Additional file 3:**

**Table S2. Quality assessment of total RNA extracted from, and cDNA libraries of, *V. faba* cotyledons used for Illumina sequencing.** RNA was extracted from adaxial epidermal (ep) or storage parenchyma (sp) cells of cultured *V. faba* cotyledons. RNA used to construct the reference library (Reference) was pooled from total RNA extracted from freshly harvested and cultured cotyledons harvested at specified times. Transcriptomes for ep and sp were generated from tissues collected from fresh cotyledons or from 3- and 12-h cultured cotyledons.

| Sample    | Total RNA     |                            | cDNA library             |                   |                |                   |                   |                   |
|-----------|---------------|----------------------------|--------------------------|-------------------|----------------|-------------------|-------------------|-------------------|
|           | Conc. (ng/μl) | RNA Integrity Number (RIN) | Calibrated conc. (ng/μl) | Molarity (nmol/l) | Peak size (bp) | Average size (bp) | Minimum size (bp) | Maximum size (bp) |
| Reference | 111           | 5.6                        | 28.2                     | 145               | 254            | 294               | 178               | 567               |
| 0 h ep 1  | 422           | 5.2                        | 40.2                     | 195               | 249            | 317               | 171               | 684               |
| 0 h ep 2  | 204           | 4.8                        | 30.8                     | 145               | 259            | 326               | 178               | 693               |
| 0 h ep 3  | 146           | 4.7                        | 32.4                     | 152               | 254            | 327               | 178               | 774               |
| 0 h sp 1  | 142           | 5                          | 31.7                     | 153               | 254            | 319               | 175               | 665               |
| 0 h sp 2  | 199           | 4.8                        | 32.1                     | 159               | 252            | 310               | 174               | 667               |
| 0 h sp 3  | 59            | 5.1                        | 30.3                     | 155               | 240            | 301               | 168               | 650               |
| 3 h ep 1  | 159           | 4.7                        | 32.3                     | 156               | 248            | 318               | 174               | 706               |
| 3 h ep 2  | 438           | 4.7                        | 22.3                     | 99                | 293            | 347               | 190               | 711               |
| 3 h ep 3  | 326           | 4.8                        | 28.0                     | 133               | 246            | 325               | 172               | 690               |
| 3 h sp 1  | 101           | 4.8                        | 32.1                     | 150               | 259            | 329               | 186               | 558               |
| 3 h sp 2  | 116           | 4.6                        | 25.3                     | 119               | 253            | 325               | 171               | 675               |
| 3 h sp 3  | 286           | 4.7                        | 29.0                     | 135               | 248            | 329               | 173               | 730               |
| 12 h ep 1 | 100           | 4.6                        | 30.5                     | 145               | 254            | 323               | 179               | 717               |
| 12 h ep 2 | 139           | 5.1                        | 41.0                     | 185               | 252            | 347               | 185               | 817               |
| 12 h ep 3 | 166           | 4.7                        | 31.3                     | 152               | 254            | 317               | 177               | 691               |
| 12 h sp 1 | 79            | 7.7                        | 29.2                     | 144               | 246            | 310               | 165               | 671               |
| 12 h sp 2 | 110           | 9.7                        | 28.5                     | 127               | 268            | 345               | 186               | 776               |
| 12 h sp 3 | 299           | 4.7                        | 17.5                     | 76                | 299            | 355               | 189               | 730               |
