# Supplementary material for: Differential transcriptional networks associated with key phases of ingrowth wall construction in trans-differentiating epidermal transfer cells of Vicia faba cotyledons
Source: PubMed Central journal article supplement (PMC4437447; doi:10.1186/s12870-015-0486-5), 2015-04-16
Supplement: 12870_2015_486_MOESM6_ESM.pdf [file 12870_2015_486_MOESM6_ESM.pdf]

**Additional file 6:****Table S5. Primer sequences used for qRT-PCR determination of expression levels of specified genes to validate RNAseq data sets.**

| Cell type/IW phase          | Gene ID   | Forward primer           | Reverse primer          |
|-----------------------------|-----------|--------------------------|-------------------------|
| Epidermal cell switched off | U11391    | GCGTGGCTGTACCAACCTAT     | GAGTAACGAGAAGATCGGCG    |
|                             | U3705     | CCTCCTCTGAATACGGCAAA     | ACTTCCTAGCAAACCTCCGCA   |
|                             | U30408    | CCCAACAAAACAAGCAGTGA     | AGAACATCATTGGAACGCC     |
| UW/WI shared no change      | U20195    | ATTGCCGAAAGGATACATCG     | TGAAGACACCAAAAACCTCCC   |
|                             | U17935    | GGGCTCGTGATTCTCTACGG     | AAACCACCACCCACAAACT     |
|                             | U1054     | CCATCATCACAAGCACCAAC     | ATTCAAATGGGGCACAACAT    |
| UW upregulated and specific | CL2028C1  | ACTGCTGCCAATGAGCTCTT     | TCGAGAATTTTCAGCCACGCT   |
|                             | U9859     | AACCGCATGCAAATCCACAC     | GGTCGCTGAGGGATTGACAA    |
|                             | U18006    | CTCTTCCGGCGAGACAACAT     | AACATTCTGAACAACCGCGC    |
| WI upregulated and specific | U20013    | CAAGGAAACAACGACGCTGG     | CGTTCCCCTCTTGACGTGA     |
|                             | U2598     | GGCTTCCACATGACATCCCA     | GTTTCGGGTGTTTGGTTGTCG   |
|                             | U12386    | CTTAAACGCCACCATTCCGC     | CTTAAACGCCACCATTCCGC    |
| Stably expressed            | CL4934C4  | AGGGTTAGTGAGCACCATGC     | ATAGCCAAAGGGAATACGCC    |
|                             | CL7083C1  | GACAACATGATTGAGAGGTCCACC | GGCTCCTTCTCAATCTCCTTACC |
|                             | CL8111C 2 | GATTCTCGATGCAGGGCTAC     | CCACTGCTCTTGCTCTTTC     |
