# Supplementary material for: Differential transcriptional networks associated with key phases of ingrowth wall construction in trans-differentiating epidermal transfer cells of Vicia faba cotyledons
Source: PubMed Central journal article supplement (PMC4437447; doi:10.1186/s12870-015-0486-5), 2015-04-16
Supplement: 12870_2015_486_MOESM7_ESM.pdf [file 12870_2015_486_MOESM7_ESM.pdf]

**Additional file 7:**

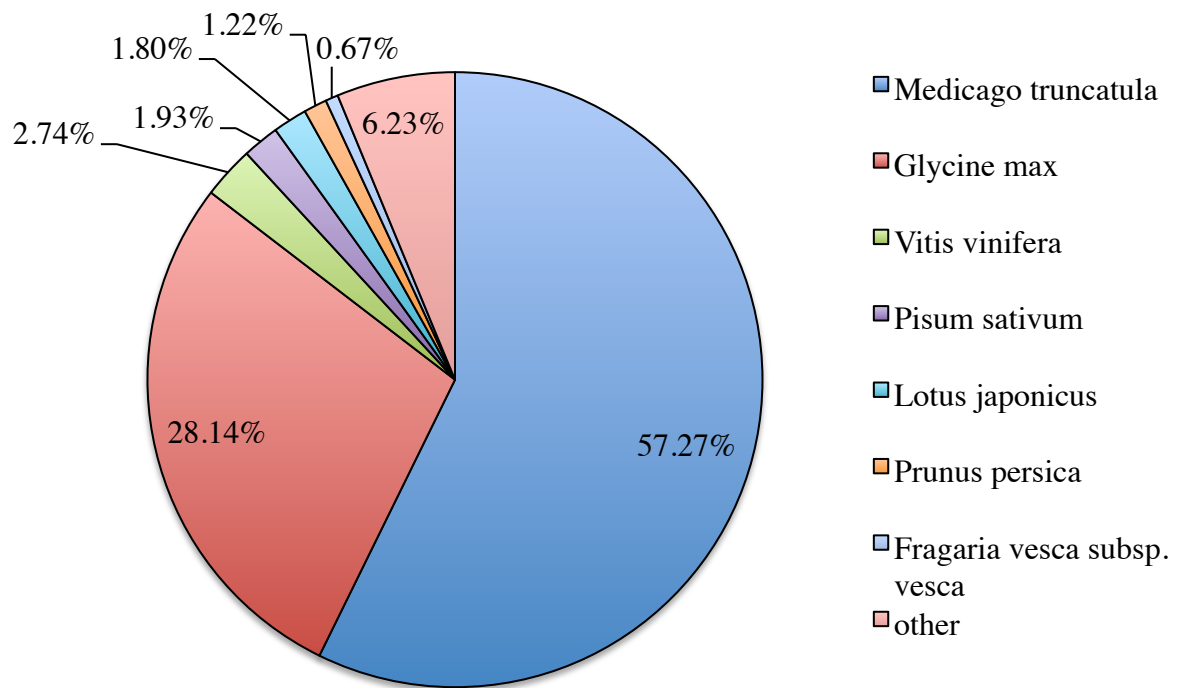

**Figure S3. Species distribution of genes with highest sequence similarity (lowest BLAST E value) to unigenes in the reference transcriptome library of *trans*-differentiating adaxial epidermal cells of cultured *V. faba* cotyledons.** Data obtained by aligning unigenes from the reference library with NCBI nr, Swissprot, KEGG, and COG databases using BlastX.
