# Supplementary material for: Differential transcriptional networks associated with key phases of ingrowth wall construction in trans-differentiating epidermal transfer cells of Vicia faba cotyledons
Source: PubMed Central journal article supplement (PMC4437447; doi:10.1186/s12870-015-0486-5), 2015-04-16
Supplement: 12870_2015_486_MOESM8_ESM.pdf [file 12870_2015_486_MOESM8_ESM.pdf]

**Additional file 8:****Table S6. Reads generated from Illumina sequencing used to identify gene cohorts linked with uniform wall and wall ingrowth deposition in *trans*-differentiating epidermal cells of *V. faba* cotyledons.** Total RNA sequenced from adaxial epidermal (ep) and storage parenchyma (sp) cells of freshly harvested (0 h) cotyledons or cotyledons cultured on MS medium for 3 and 12 h.

| Sample    | Raw reads  | Clean reads | Mapped clean reads | % mapped clean reads | % perfect matched clean reads |
|-----------|------------|-------------|--------------------|----------------------|-------------------------------|
| 0 h ep 1  | 37,477,731 | 36,400,767  | 31,397,825         | 86.26%               | 57.19%                        |
| 0 h ep 2  | 25,581,177 | 24,860,572  | 21,722,916         | 87.38%               | 58.06%                        |
| 0 h ep 3  | 26,538,570 | 25,825,680  | 22,595,495         | 87.49%               | 58.08%                        |
| 0 h sp 1  | 30,443,345 | 29,396,577  | 24,446,740         | 83.16%               | 56.77%                        |
| 0 h sp 2  | 38,229,224 | 36,998,634  | 31,441,909         | 84.98%               | 60.03%                        |
| 0 h sp 3  | 36,040,869 | 34,805,881  | 28,559,365         | 82.05%               | 52.96%                        |
| 3 h ep 1  | 30,296,809 | 29,426,559  | 25,898,156         | 88.01%               | 67.96%                        |
| 3 h ep 2  | 34,106,713 | 33,096,144  | 28,850,639         | 87.17%               | 65.10%                        |
| 3 h ep 3  | 29,366,660 | 28,397,663  | 24,554,446         | 86.47%               | 61.44%                        |
| 3 h sp 1  | 32,737,030 | 31,794,749  | 26,821,369         | 84.36%               | 57.81%                        |
| 3 h sp 2  | 30,448,510 | 29,423,291  | 24,934,716         | 84.74%               | 60.75%                        |
| 3 h sp 3  | 34,011,695 | 32,987,900  | 27,712,021         | 84.01%               | 57.43%                        |
| 12 h ep 1 | 37,718,811 | 36,695,393  | 32,041,507         | 87.32%               | 58.20%                        |
| 12 h ep 2 | 32,005,465 | 31,132,834  | 26,889,958         | 86.37%               | 61.83%                        |
| 12 h ep 3 | 23,397,571 | 22,639,579  | 19,570,804         | 86.45%               | 61.42%                        |
| 12 h sp 1 | 19,547,655 | 18,601,921  | 15,492,084         | 83.28%               | 55.73%                        |
| 12 h sp 2 | 31,219,651 | 30,067,109  | 24,976,404         | 83.07%               | 59.70%                        |
| 12 h sp 3 | 23,138,669 | 22,192,857  | 18,904,761         | 85.18%               | 61.54%                        |
