# Supplementary material for: Differential transcriptional networks associated with key phases of ingrowth wall construction in trans-differentiating epidermal transfer cells of Vicia faba cotyledons
Source: PubMed Central journal article supplement (PMC4437447; doi:10.1186/s12870-015-0486-5), 2015-04-16
Supplement: 12870_2015_486_MOESM9_ESM.pdf [file 12870_2015_486_MOESM9_ESM.pdf]

**Additional file 9:**

**Table S7. Temporal profile of unigene numbers expressed in adaxial epidermal or storage parenchyma cells of cultured *V. faba* cotyledons.** Only unigenes with a RPKM >0.45 in all three biological replicates of each cell type for a specified sampling time were defined as being ‘expressed’.

| Culture time (h) | Cotyledon cell type             | Unigene number |
|------------------|---------------------------------|----------------|
| 0                | Adaxial epidermal cell          | 27,244         |
|                  | Storage parenchyma cell         | 20,876         |
| 3                | Adaxial epidermal transfer cell | 29,194         |
|                  | Storage parenchyma cell         | 23,887         |
| 12               | Adaxial epidermal transfer cell | 27,600         |
|                  | Storage parenchyma cell         | 23,220         |
