# Supplementary material for: Differential transcriptional networks associated with key phases of ingrowth wall construction in trans-differentiating epidermal transfer cells of Vicia faba cotyledons
Source: PubMed Central journal article supplement (PMC4437447; doi:10.1186/s12870-015-0486-5), 2015-04-16
Supplement: 12870_2015_486_MOESM11_ESM.pdf [file 12870_2015_486_MOESM11_ESM.pdf]

**Additional file 11:**

**Table S8. Genes encoding proteins generating or transducing developmental signals switched off in epidermal cells transiting to a TC fate and those specifically expressed in epidermal cells undergoing *trans*-differentiation to a TC morphology.** TC-specific genes separated into those genes expressed throughout uniform wall (UW) and wall ingrowth (WI) formation and those that are specific to each of these wall-building phases. Genes expressed throughout ingrowth wall formation are separated into groups depending on their differential expression patterns of no change, up-regulated during UW or WI formation (for more details, see Results - Transcriptome networks in epidermal cells of *in planta* and cultured cotyledons). Unigene sequences were annotated by alignment to publically available databases (see Methods) using BLASTX with an e-value threshold of  $<1e^{-5}$ .

| Epidermal genes switched off |                                | Transfer cell specific expressed genes |                                                 |                 |                                              |             |                                              |                 |                                           |             |                                             |
|------------------------------|--------------------------------|----------------------------------------|-------------------------------------------------|-----------------|----------------------------------------------|-------------|----------------------------------------------|-----------------|-------------------------------------------|-------------|---------------------------------------------|
|                              |                                | UW/WI no change                        |                                                 | UW up-regulated |                                              | UW specific |                                              | WI up-regulated |                                           | WI specific |                                             |
| Contig ID                    | Gene                           | Contig ID                              | Gene                                            | Contig ID       | Gene                                         | Contig ID   | Gene                                         | Contig ID       | Gene                                      | Contig ID   | Gene                                        |
| <b>Auxin</b>                 |                                |                                        |                                                 |                 |                                              |             |                                              |                 |                                           |             |                                             |
| U31687                       | Auxin response factor          | CL3007 C9                              | Auxin-induced protein                           | U19196          | AUX/IAA family member IAA4                   |             |                                              | U9020           | Indole-3-acetate O-methyltransferase      | CL165C 2    | Indole-3-glycerol phosphate synthase        |
| U14020                       | Indole-3-acetic acid inducible | CL4055 C3                              | Auxin-induced protein like protein              |                 |                                              |             |                                              | CL2550 C1       | Auxin efflux carrier protein              | CL7523 C1   | Auxin influx protein                        |
|                              |                                |                                        |                                                 |                 |                                              |             |                                              | U8726           | Auxin-induced protein                     | U17577      | Auxin-induced protein 6B                    |
|                              |                                |                                        |                                                 |                 |                                              |             |                                              | CL989 C4        | PCNT115                                   | U6397       | Class III HD-Zip protein 2                  |
|                              |                                |                                        |                                                 |                 |                                              |             |                                              |                 |                                           | U33780      | MYB TF/ KAN                                 |
|                              |                                |                                        |                                                 |                 |                                              |             |                                              |                 |                                           | U3299       | WUSCHEL-related homeobox 5 (WOX5)           |
|                              |                                |                                        |                                                 |                 |                                              |             |                                              |                 |                                           | U3298       | WUSCHEL                                     |
|                              |                                |                                        |                                                 |                 |                                              |             |                                              |                 |                                           | U37422      | SAUR                                        |
|                              |                                |                                        |                                                 |                 |                                              |             |                                              |                 |                                           | U3409       | RAMOSUS5                                    |
| <b>Ethylene</b>              |                                |                                        |                                                 |                 |                                              |             |                                              |                 |                                           |             |                                             |
| U11391                       | Ethylene receptor              | CL3488 C2                              | 1-aminocyclopropane-1-carboxylate oxidase       | CL8157 C2       | Aminocyclopropane-1-carboxylic acid synthase | CL2028 C1   | 1-aminocyclopropane-1-carboxylate synthase   | U8572           | 1-aminocyclopropane-1-carboxylate oxidase | U15922      | Aminocyclopropane-1-carboxylate oxidase     |
|                              |                                | U18687                                 | Ethylene-responsive transcription factor RAP2-6 | U225            | ERF019                                       | CL2028 C2   | 1-aminocyclopropane-1-carboxylate synthase 7 |                 |                                           | U12540      | Ethylene responsive transcription factor 1a |
|                              |                                |                                        |                                                 |                 |                                              | U18915      | ERF110                                       |                 |                                           |             |                                             |
|                              |                                |                                        |                                                 |                 |                                              | U18987      | ERF110                                       |                 |                                           |             |                                             |
|                              |                                |                                        |                                                 |                 |                                              | U14736      | ERF110                                       |                 |                                           |             |                                             |
|                              |                                |                                        |                                                 |                 |                                              | U24481      | ERF054-like                                  |                 |                                           |             |                                             |
|                              |                                |                                        |                                                 |                 |                                              | U30633      | ERF SHINE                                    |                 |                                           |             |                                             |
| <b>Gibberellins</b>          |                                |                                        |                                                 |                 |                                              |             |                                              |                 |                                           |             |                                             |
| CL1664 C1                    | Transcription factor GAMYB     | U20036                                 | Short internode related sequence                | U30186          | Gibberellin 2-beta-dioxygenase 8-like        | CL5309 C2   | Gibberellin 20 oxidase 1-like                |                 |                                           |             |                                             |
|                              |                                |                                        |                                                 |                 |                                              | CL449C 1    | Gibberellin 3-beta-dioxygenase 4-like        |                 |                                           |             |                                             |
|                              |                                |                                        |                                                 |                 |                                              | U25483      | 2-beta-dioxygenase 2                         |                 |                                           |             |                                             |
|                              |                                |                                        |                                                 |                 |                                              | U16470      | Gibberellin 2-oxidase                        |                 |                                           |             |                                             |

| <b>Abscisic acid</b> |                                                                     |              |                                            |              |                                            |                  |                                             |              |                         |              |                                                        |
|----------------------|---------------------------------------------------------------------|--------------|--------------------------------------------|--------------|--------------------------------------------|------------------|---------------------------------------------|--------------|-------------------------|--------------|--------------------------------------------------------|
| CL4429<br>C4         | type I inositol-1,4,5-<br>trisphosphate 5-<br>phosphatase CVP2-like | U17050       | PYL6                                       | U32247       | Transcription factor<br>LEC1-A             | U16482           | protein phosphatase 2C<br>25-like           | CL5144<br>C1 | ABR18                   | U20017       | Abscisic acid<br>hydroxylase 2-like                    |
|                      |                                                                     | CL5483<br>C2 | Mps one binder kinase<br>activator-like 1A |              |                                            | U15900           | Transcription factor<br>bHLH122             |              |                         | U15674       | Aldehyde oxidase 3                                     |
|                      |                                                                     |              |                                            |              |                                            | U21705           | WRKY transcription<br>factor 33-like        |              |                         |              |                                                        |
|                      |                                                                     |              |                                            |              |                                            | U16630           | WRKY transcription<br>factor 40-like        |              |                         |              |                                                        |
| <b>Cytokinins</b>    |                                                                     |              |                                            |              |                                            |                  |                                             |              |                         |              |                                                        |
|                      |                                                                     |              |                                            | U25276       | Cytokinin-O-<br>glucosyltransferase        | U35673           | Cytokinin-O-<br>glucosyltransferase         | U23225       | Cytokinin dehydrogenase | CL458<br>C2  | Cytokinin-O-<br>glucosyltransferase                    |
|                      |                                                                     |              |                                            | U7541        | Cytokinin-O-<br>glucosyltransferase        | U28147           | Cytokinin-O-<br>glucosyltransferase         |              |                         |              |                                                        |
| <b>ROS</b>           |                                                                     |              |                                            |              |                                            |                  |                                             |              |                         |              |                                                        |
| U10474               | Nucleobase-ascorbate<br>transporter 11-like                         |              |                                            | U21465       | L-ascorbate oxidase                        | U2649            | L-gulonolactone oxidase-<br>like            | CL8648<br>C2 | Peroxidase              | U6799        | Respiratory burst<br>oxidase homolog<br>protein E-like |
| U22639               | Peroxidase 19-like                                                  |              |                                            |              |                                            |                  |                                             |              |                         | U37639       | Carboxymethylenebut<br>enolidase-like protein          |
|                      |                                                                     |              |                                            |              |                                            |                  |                                             |              |                         | CL8648<br>C1 | Peroxidase                                             |
| <b>Calcium</b>       |                                                                     |              |                                            |              |                                            |                  |                                             |              |                         |              |                                                        |
|                      |                                                                     | U23903       | Cyclic nucleotide-gated<br>channel         | U23902       | Cyclic nucleotide-gated<br>channel         | Unigene<br>29153 | Autoinhibited calcium<br>ATPase             |              |                         | U36148       | IQ-DOMAIN 1-like<br>containing protein                 |
|                      |                                                                     | U18508       | Annexin                                    | U29950       | Cyclic nucleotide-gated<br>channel 15 like | U20796           | Calcium-dependent<br>protein kinase 1-like  |              |                         | U11156       | IQ domain-containing<br>protein                        |
|                      |                                                                     | U35348       | IQ-DOMAIN 14-like<br>protein               | CL4204<br>C1 | Potassium channel<br>SKOR                  | U20795           | Calcium-dependent<br>protein kinase 2-like  |              |                         |              |                                                        |
|                      |                                                                     |              |                                            | CL1526<br>C1 | Type IIB calcium<br>ATPase MCA5            | U20217           | Calcium-dependent<br>protein kinase 24-like |              |                         |              |                                                        |
|                      |                                                                     |              |                                            | U18269       | Calcium-binding protein<br>CML16-like      | U20889           | Copine03                                    |              |                         |              |                                                        |
|                      |                                                                     |              |                                            | U14697       | Calcium binding protein                    |                  |                                             |              |                         |              |                                                        |
|                      |                                                                     |              |                                            | U12681       | Guanylyl cyclase                           |                  |                                             |              |                         |              |                                                        |
|                      |                                                                     |              |                                            | U984         | MLO1                                       |                  |                                             |              |                         |              |                                                        |
