# Supplementary material for: Differential transcriptional networks associated with key phases of ingrowth wall construction in trans-differentiating epidermal transfer cells of Vicia faba cotyledons
Source: PubMed Central journal article supplement (PMC4437447; doi:10.1186/s12870-015-0486-5), 2015-04-16
Supplement: 12870_2015_486_MOESM12_ESM.pdf [file 12870_2015_486_MOESM12_ESM.pdf]

**Additional file 12:**

**Table S9. Genes encoding proteins involved in regulation of the cytoskeleton and vesicle trafficking and sphingolipid/sterol synthesis and transport that are switched off in epidermal cells transiting to a TC fate and those specifically expressed in epidermal cells undergoing *trans*-differentiation to a TC morphology.** TC -specific genes are separated into genes expressed throughout uniform wall (UW) and wall ingrowth (WI) formation and those that are specific to each of these wall-building phases. Genes expressed throughout ingrowth wall formation are separated into groups depending on their differential expression patterns of no change, up-regulated during UW or WI formation (for more details, see – Results, Transcriptome networks in epidermal cells of *in planta* and cultured cotyledons). Unigene sequences were annotated by alignment to publically available databases (see Methods) using BLASTX with an e-value threshold of  $<1e^{-5}$ .

| Epidermal switched off                      |                                      | Transfer cell specific expressed genes: |                                                                                                                                                                               |                |                                                         |             |                                                   |                |                   |             |                                                                                   |
|---------------------------------------------|--------------------------------------|-----------------------------------------|-------------------------------------------------------------------------------------------------------------------------------------------------------------------------------|----------------|---------------------------------------------------------|-------------|---------------------------------------------------|----------------|-------------------|-------------|-----------------------------------------------------------------------------------|
|                                             |                                      | UW/WI no change                         |                                                                                                                                                                               | UW upregulated |                                                         | UW specific |                                                   | WI upregulated |                   | WI specific |                                                                                   |
| Contig ID                                   | Gene                                 | Contig ID                               | Gene                                                                                                                                                                          | Contig ID      | Gene                                                    | Contig ID   | Gene                                              | Contig ID      | Gene              | Contig ID   | Gene                                                                              |
| <b>Cytoskeleton and vesicle trafficking</b> |                                      |                                         |                                                                                                                                                                               |                |                                                         |             |                                                   |                |                   |             |                                                                                   |
| U22353                                      | Kinesin-4                            | U1553                                   | Similar to gb U06698 neuronal kinesin heavy chain from Homo sapiens and contains a PF 00225 Kinesin motor domain. EST gb AA042507 comes from this gene [Arabidopsis thaliana] |                |                                                         | CL2210 C1   | actin                                             |                |                   | CL2130 C1   | 65-kDa microtubule-associated protein 3-like [Glycine max] MAP65-5 in Arabidopsis |
| U10534                                      | Kinesin-like protein                 | U1054                                   | Formin-like protein                                                                                                                                                           |                |                                                         | U8030       | actin-97-like                                     |                |                   | U16493      | Kinesin-like polypeptide                                                          |
| CL6198 C2                                   | 125 kDa kinesin-related protein-like |                                         |                                                                                                                                                                               |                |                                                         | CL6200 C1   | Myosin XI                                         |                |                   | CL7887 C2   | Villin-4                                                                          |
| U36967                                      | formin-like protein 8-like           |                                         |                                                                                                                                                                               |                |                                                         |             |                                                   |                |                   |             |                                                                                   |
| U11691                                      | Protein ABIL1                        |                                         |                                                                                                                                                                               |                |                                                         |             |                                                   |                |                   |             |                                                                                   |
| U3882                                       | Myosin-like protein                  |                                         |                                                                                                                                                                               |                |                                                         |             |                                                   |                |                   |             |                                                                                   |
| CL6120 C6                                   | Rab-GDP dissociation inhibitor       | CL6109 C2                               | GTP-binding protein SAR1A                                                                                                                                                     | U18006         | ADP-ribosylation factor GTPase-activating protein AGD12 | U21725      | ADP-ribosylation factor GTPase-activating protein | U9470          | syntaxin-112-like | U12467      | ADP-ribosylation factor GTPase-activating protein AGD14-like isoform X1           |
| U15938                                      | GTPase obg                           | CL4945 C3                               | ER-derived vesicles protein ERV14                                                                                                                                             | U12722         | Dynamin-related protein 1C-like isoform 2               | U4133       | Rab-GDP dissociation inhibitor                    |                |                   | CL4811 C2   | Exocyst complex component SEC3A-like                                              |

|                                                           |                                           |              |                                                |              |                                                           |               |                                                           |        |                   |              |                                            |
|-----------------------------------------------------------|-------------------------------------------|--------------|------------------------------------------------|--------------|-----------------------------------------------------------|---------------|-----------------------------------------------------------|--------|-------------------|--------------|--------------------------------------------|
| CL1125<br>C1                                              | small GTP-binding protein, partial        | U19005       | signal peptide peptidase-like 2B-like          |              |                                                           | U35180        | Brefeldin A-inhibited guanine nucleotide-exchange protein |        |                   | U9471        | Syntaxin-112                               |
| U5119                                                     | Probable exocyst complex component 6-like | U7624        | Plant synaptotagmin [                          |              |                                                           | U21554        | Exocyst complex component                                 |        |                   | CL3098<br>C3 | Dynamamin-2B-like                          |
|                                                           |                                           |              |                                                |              |                                                           | U5838         | Endoplasmic oxidoreductin-1                               |        |                   |              |                                            |
|                                                           |                                           |              |                                                |              |                                                           | U9284         | Vesicle-associated protein 2-1-like                       |        |                   |              |                                            |
|                                                           |                                           |              |                                                |              |                                                           | U2172         | Vesicle-associated membrane protein                       |        |                   |              |                                            |
| <b>Sphingolipid and sterol biosynthesis and transport</b> |                                           |              |                                                |              |                                                           |               |                                                           |        |                   |              |                                            |
|                                                           |                                           | CL2667<br>C2 | 3-ketoacyl-CoA synthase                        | U6945        | Biotin carboxyl carrier protein of acetyl-CoA carboxylase | U32221        | Oxysterol-binding protein-related protein                 | U12386 | Epoxide hydrolase | U11800       | 3-ketoacyl-CoA synthase 21-like            |
|                                                           |                                           | U7625        | non-specific lipid-transfer protein AKCS9-like | CL6235C<br>1 | 3-ketoacyl-CoA synthase                                   | CL10929<br>C1 | Long-chain-fatty-acid-CoA ligase                          |        |                   | U35890       | Elongation of fatty acids protein          |
|                                                           |                                           | CL9118C<br>2 | bax inhibitor 1-like                           | CL5837C<br>1 | 3-ketoacyl-CoA synthase                                   | CL4043        | Remorin                                                   |        |                   | U31293       | Squalene epoxidase                         |
|                                                           |                                           |              |                                                | U7915        | beta-ketoacyl-CoA synthase                                |               |                                                           |        |                   | U14071       | Epoxide hydrolase                          |
|                                                           |                                           |              |                                                | U8918        | non-specific lipid-transfer protein AKCS9-like            |               |                                                           |        |                   | U40880       | lipid transfer protein precursor           |
|                                                           |                                           |              |                                                |              |                                                           |               |                                                           |        |                   | U12302       | PCTP-like protein-like                     |
|                                                           |                                           |              |                                                |              |                                                           |               |                                                           |        |                   | U32592       | Long-chain-alcohol O-fatty-acyltransferase |
