# Supplementary material for: Differential transcriptional networks associated with key phases of ingrowth wall construction in trans-differentiating epidermal transfer cells of Vicia faba cotyledons
Source: PubMed Central journal article supplement (PMC4437447; doi:10.1186/s12870-015-0486-5), 2015-04-16
Supplement: 12870_2015_486_MOESM13_ESM.pdf [file 12870_2015_486_MOESM13_ESM.pdf]

**Additional file 13:**

**Table S10. Genes encoding cell wall biosynthetic and remodelling enzymes and structural proteins switched off in epidermal cells transiting to a TC fate and those specifically expressed in epidermal cells undergoing *trans*-differentiation to a TC morphology.** TC-specific genes are separated into those genes expressed throughout uniform wall (UW) and wall ingrowth (WI) formation and those that are specific to each of these wall-building phases. Genes expressed throughout ingrowth wall formation are separated into groups depending on their differential expression patterns of no change, up-regulated during UW or WI formation (for more details, see – Results, Transcriptome networks in epidermal cells of *in planta* and cultured cotyledons). Unigene sequences were annotated by alignment to publically available databases (see Methods) using BLASTX with an e-value threshold of  $<1e^{-5}$ .

| Epidermal cell genes switched off |                                      | Transfer-cell specific expressed genes |                    |                 |                                                     |             |                                             |                 |                                   |             |                                  |
|-----------------------------------|--------------------------------------|----------------------------------------|--------------------|-----------------|-----------------------------------------------------|-------------|---------------------------------------------|-----------------|-----------------------------------|-------------|----------------------------------|
|                                   |                                      | UW/WI no change                        |                    | UW up-regulated |                                                     | UW specific |                                             | WI up-regulated |                                   | WI specific |                                  |
| Contig ID                         | Gene                                 | Contig ID                              | Gene               | Contig ID       | Gene                                                | Contig ID   | Gene                                        | Contig ID       | Gene                              | Contig ID   | Gene                             |
| <b>Cellulose</b>                  |                                      |                                        |                    |                 |                                                     |             |                                             |                 |                                   |             |                                  |
| U3705                             | Cellulose synthase catalytic subunit |                                        |                    | U35532          | GPI-anchored protein                                | U31167      | Endoglucanase                               | U30949          | Acidic endochitinase-like protein | CL1800.C5   | Beta-glucosidase                 |
| U15597                            | Cellulose synthase catalytic subunit |                                        |                    |                 |                                                     | CL3775.C2   | Endoglucanase                               |                 |                                   |             |                                  |
| CL7904.C1                         | Cellulose synthase-like protein H1   |                                        |                    |                 |                                                     | U30633      | ERF SHINE                                   |                 |                                   |             |                                  |
| <b>Matrix polysaccharides</b>     |                                      |                                        |                    |                 |                                                     |             |                                             |                 |                                   |             |                                  |
| CL9188.C1                         | Xylan 1 4-beta-xylosidase            | CL8806C2                               | Xylosyltransferase | U15114          | Beta-D-xylosidase 5-like                            | CL8806.C2   | Xylosyltransferase                          | CL6667.C1       | Beta-galactosidase                | U34223      | Alpha-D-xylosidase               |
| U1567                             | Expansin                             | CL10235.C1                             | Expansin-A4-like   | CL6394.C1       | Xyloglucan-specific endoglucanase inhibitor protein | U3247       | Glycosyltransferase family GT8 protein      | U41126          | Subtilisin-like protease          | CL8194.C2   | Alpha-xylosidase-like            |
| U30965                            | Galacturonosyl-transferase 11        | CL2572.C3                              | Alpha-expansin     | U15415          | NAC domain protein NAC2                             | U3248       | Glycosyltransferase family GT8 protein      | U26002          | Glucan endo-1,3-beta-glucosidase  | U12075      | Alpha-expansin                   |
| U24012                            | Pectinesterase                       | CL9884.C2                              | Pectinesterase     | U9859           | Pectinesterase/pectinesterase inhibitor 41-like     | U22861      | Xyloglucan endotransglycosylase hydrolase 2 |                 |                                   | U4017       | Beta-galactosidase               |
| U31151                            | Pectinesterase                       |                                        |                    | CL5918.C1       | Polygalacturonase inhibiting protein                | CL9193.C1   | Xyloglucan endotransglucosylase/hydrolase   |                 |                                   | U36200      | UDP-glucuronosyl-transferase 1-1 |
| U5021                             | Pectinesterase                       |                                        |                    | U20328          | Cinnamoyl CoA reductase                             | U31050      | Xyloglucan endotransglucosylase/hydrolase   |                 |                                   | U20013      | Endo-beta-1 3-glucanase          |
| U2932                             | Subtilisin-like serine protease      |                                        |                    |                 |                                                     | U8264       | Xyloglucan endotransglucosylase/hydrolase   |                 |                                   | U16698      | Trans-cinnamate 4-monooxygenase  |
| U38413                            | Callose synthase                     |                                        |                    |                 |                                                     | CL7192.C3   | Xyloglucan endotransglucosylase             |                 |                                   |             |                                  |
| U30408                            | Glucan endo-1,3-beta-d-glucosidase   |                                        |                    |                 |                                                     | U16662      | Expansin-A12-like                           |                 |                                   |             |                                  |

|                                      |                                        |           |                                      |        |                          |           |                                                                                 |           |                                               |           |                                               |
|--------------------------------------|----------------------------------------|-----------|--------------------------------------|--------|--------------------------|-----------|---------------------------------------------------------------------------------|-----------|-----------------------------------------------|-----------|-----------------------------------------------|
|                                      |                                        |           |                                      |        |                          | CL4158.C2 | Galacturonosyltransferase 13-like                                               |           |                                               |           |                                               |
|                                      |                                        |           |                                      |        |                          | CL7790.C1 | Pectinesterase                                                                  |           |                                               |           |                                               |
|                                      |                                        |           |                                      |        |                          | CL7192.C1 | Pectinesterase                                                                  |           |                                               |           |                                               |
|                                      |                                        |           |                                      |        |                          | U29365    | N-hydroxycinnamoyl/benzoyltransferase                                           |           |                                               |           |                                               |
|                                      |                                        |           |                                      |        |                          | CL9121.C2 | Cinnamyl alcohol dehydrogenase-related protein                                  |           |                                               |           |                                               |
| <b>Cell wall structural proteins</b> |                                        |           |                                      |        |                          |           |                                                                                 |           |                                               |           |                                               |
| U10288                               | Fasciclin-like arabinogalactan protein | CL5752.C2 | Prolyl 4-hydroxylase subunit alpha-1 | U26015 | Extensin class 1 protein | U13038    | Arabinogalactan peptide                                                         | CL6100.C3 | Extensin nodule-specific proline-rich protein | CL6100.C2 | Extensin=nodule-specific proline-rich protein |
| U22417                               | Fasciclin-like arabinogalactan protein | U9245     | Extensin                             | U901   | Extensin-like protein    | U34866    | TPA: putative proline-rich extensin-like receptor protein kinase family protein | CL6100.C3 | Extensin=nodule-specific proline-rich protein | U11743    | extensin=nodule-specific proline-rich protein |
|                                      |                                        | CL7881.C1 | Glycine-rich protein                 | U14236 | Extensin-like protein    | U274      | Putative glycine rich protein precursor                                         | CL5023.C1 | Hydroxyproline-rich glycoprotein DZ-HRGP      | U8399     | Pollen Ole e 1 allergen and extensin          |
|                                      |                                        |           |                                      |        |                          |           |                                                                                 | CL5788.C1 | Repetitive proline-rich cell wall protein     | CL5788.C2 | Repetitive proline-rich cell wall protein     |
|                                      |                                        |           |                                      |        |                          |           |                                                                                 | CL3930.C1 | Pherophorin-S                                 | CL8701.C2 | Stem 28 kDa glycoprotein                      |
