# Supplementary material for: Differential transcriptional networks associated with key phases of ingrowth wall construction in trans-differentiating epidermal transfer cells of Vicia faba cotyledons
Source: PubMed Central journal article supplement (PMC4437447; doi:10.1186/s12870-015-0486-5), 2015-04-16
Supplement: 12870_2015_486_MOESM14_ESM.pdf [file 12870_2015_486_MOESM14_ESM.pdf]

**Additional file 14:**

**Table S11. Genes encoding membrane transporters switched off in epidermal cells transiting to a TC fate and those specifically expressed in epidermal cells undergoing *trans*-differentiation to a TC morphology.** TC-specific genes separated into those genes expressed throughout uniform wall (UW) and wall ingrowth (WI) formation and those that are specific to each of these wall-building phases. Genes expressed throughout ingrowth wall formation are separated into groups depending on their differential expression patterns of no change, up-regulated during UW or WI formation (for more details, see – Results, Transcriptome networks in epidermal cells of *in planta* and cultured cotyledons). Unigene sequences were annotated by alignment to publically available databases (see Methods) using BLASTX with an e-value threshold of  $<1e^{-5}$ .

| Epidermal cell genes switched off |                                              | Transfer cell specific expressed genes |                                               |                 |                                                       |             |                                                      |                 |                          |             |                                              |
|-----------------------------------|----------------------------------------------|----------------------------------------|-----------------------------------------------|-----------------|-------------------------------------------------------|-------------|------------------------------------------------------|-----------------|--------------------------|-------------|----------------------------------------------|
|                                   |                                              | UW/WI shared                           |                                               | UW up-regulated |                                                       | UW specific |                                                      | WI up-regulated |                          | WI specific |                                              |
| Contig ID                         | Gene                                         | Contig ID                              | Gene                                          | Contig ID       | Gene                                                  | Contig ID   | Gene                                                 | Contig ID       | Gene                     | Contig ID   | Gene                                         |
| U33031                            | Bidirectional sugar transporter SWEET4-like  | CL7004C1                               | Amino acid permease AAP4                      | CL7082C1        | Amino-acid permease,                                  | U18246      | Sugar transporter                                    | U2598           | ABC transporter G family | CL2123C2    | Hexose transporter                           |
| U20727                            | Mannitol transporter                         | CL8772.C1                              | Peptide/nitrate transporter                   | CL5269C1        | Proline transporter                                   | U40718      | Cl-channel clc-7                                     |                 |                          | U4242       | Carbohydrate transporter                     |
| U13817                            | Metal transporter CNNM4                      | CL2654C2                               | Sodium-coupled neutral amino acid transporter | U16412          | Ammonium transporter 1 member                         | U12068      | K(+)/H(+) antiporter                                 |                 |                          | U4615       | Peptide transporter PTR3-B                   |
| U33928                            | Zn/Cd P(IB)-type ATPase                      | U24787                                 | High affinity nitrate transporter 2.5-like    | U8713           | Inorganic phosphate transporter 1-4                   | U11616      | Sulfate transporter                                  |                 |                          | CL8772.C1   | Peptide/nitrate transporter                  |
| U10474                            | Equilibrative nucleoside transporter 3-like  | U17935                                 | Ammonium transporter 3                        | U19486          | Zn/Cd P(IB)-type ATPase                               | U3485       | ABC transporter B family member                      |                 |                          | U38725      | Potassium channel AKT1-like                  |
| U15675                            | Equilibrative nucleoside transporter 3-like  | U19937                                 | Adenine/guanine permease AZG1-like            | CL5406C1        | Metal transporter CNNM4                               | U29103      | Multidrug resistance protein ABC transporter family, |                 |                          | U36661      | SST1-like protein                            |
| U36010                            | TRANSPARENT TESTA 12-like                    | CL703C7                                | Equilibrative nucleoside transporter 3-like   | CL734C1         | PREDICTED: pleiotropic drug resistance protein 1-like | U29110      | ABC transporter C family member 10-like              |                 |                          | U40089      | Magnesium-transporting ATPase, P-type 1-like |
| U25453                            | ABC transporter                              | CL8954C2                               | Aquaporin NIP1-2                              | U29110          | ABC transporter C family member 10-like               | U4110       | ABC transporter C family member 9-like               |                 |                          | U5521       | ABC transporter C family member 10-like      |
| U1457                             | ABC transporter B family member              | U20977                                 | Nodulin26-like intrinsic protein              | U16609          | ABC transporter C family member 9-like                | U3473       | TRANSPARENT TESTA                                    |                 |                          | U2872       | ABC transporter                              |
| U10945                            | ABC transporter G                            | U19332                                 | K(+)/H(+) antiporter                          | U22590          | Multidrug and toxin extrusion protein (MATE)          | U3010       | MATE efflux family protein DTX1-like                 |                 |                          | U36776      | ABC transporter                              |
| U3778                             | Ripening regulated protein DDTFR18           | CL10233C2                              | Potassium transporter                         | U29612          | Ripening regulated protein DDTFR18                    | U35103      | Ripening regulated protein DDTFR18                   |                 |                          | U5686       | TRANSPARENT TESTA                            |
| U32217                            | Multidrug resistance protein ABC transporter | U24874                                 | ABC transporter 1                             |                 |                                                       | U17657      | Zinc finger protein STOP1 homolog                    |                 |                          | U539        | Heavy metal transport/detoxification protein |
|                                   |                                              | U3474                                  | TRANSPARENT TESTA                             |                 |                                                       |             |                                                      |                 |                          | U29622      | Metal tolerance protein 10-like              |
